# Supplementary material
Source: publisher figshare collection journal article supplement (https://diabetesjournals.figshare.com/articles/dataset/_/23060858)
Supplement: Supplementary file 1 [file 1]

**Supplementary Table 1 Primers used in this manuscript.**

| Primers                    | Sequence (5'-3')                                                             |
|----------------------------|------------------------------------------------------------------------------|
| Mettl3-F                   | TGCTGTGCCTTTCTTAGTTGTC                                                       |
| Mettl3-floxR               | AGGCTCAGTCCTCCTCACAA                                                         |
| Mettl3-koR                 | GATTTCAGTGTGCTTATTG                                                          |
| Cre-F                      | CATATTGGCAGAACGAAAACGC                                                       |
| Cre-R                      | CCTGTTTCACTATCCAGGTTACGG                                                     |
| m-Pref1-F                  | GACCCACCCTGTGACCCC                                                           |
| m-Pref1-R                  | CAGGCAGCTCGTGCACCCC                                                          |
| m-Adipsin-F                | CGTACCATGACGGGGTAGTC                                                         |
| m-Adipsin-R                | ATCCGGTAGGATGACACTCG                                                         |
| m-Pparg1a-F                | CCCTGCCATTGTTAAGACC                                                          |
| m-Pparg1a-R                | TGCTGCTGTTCTCTGTTTTT                                                         |
| m-Cidea-F                  | GGTGGACACAGAGGAGTTCTTTC                                                      |
| m-Cidea-R                  | CGAAGGTGACTCTGGCTATTCC                                                       |
| m-Pparg-F                  | GGAAGACCACTCGCATTCCCTT                                                       |
| m-Pparg-R                  | GTAATCAGCAACCATTGGGTCA                                                       |
| m-Adrb3-F                  | TCTCTGGCTTTGTGGTCGGA                                                         |
| m-Adrb3-R                  | GTTGGTTATGGTCTGTAGTCTCG                                                      |
| m-Ucp1-F                   | GAGGTCGTGAAGGTCAGAAT                                                         |
| m-Ucp1-R                   | CTGTGGTGGCTATAACTCTGTAA                                                      |
| m-Prdm16-F                 | CCACCAGCGAGGACTTCAC                                                          |
| m-Prdm16-R                 | GGAGGACTCTCGTAGCTCGAA                                                        |
| m-Cox8b-F                  | GAACCATGAAGCCAACGACT                                                         |
| m-Cox8b-R                  | GCGAAGTTCACAGTGGTTCC                                                         |
| m-Dio2-F                   | GGTGGTCAACTTTGGTTACGC                                                        |
| m-Dio2-R                   | AAGTCAGCCACCGAGGAGAACT                                                       |
| m-Hsl-F                    | GCTGGGCTGTCAAGCACTGT                                                         |
| m-Hsl-R                    | GTAAGTGGTAGGCTGCCAT                                                          |
| m-Acox1-F                  | GCCATTGATACAGTGTGTGAG                                                        |
| m-Acox1-R                  | CCGAGAAAGTGAAGGCATAGG                                                        |
| m-Klf9-F                   | GGATTATTGCACGCTGGTCAC                                                        |
| m-Klf9-R                   | ATCCTCATCGGGACTCTCCA                                                         |
| m-Igf2bp1-F                | TACAAGTGTTCATCCCCGCC                                                         |
| m-Igf2bp1-R                | AGGTGTTTCTGGTGGTGCAA                                                         |
| m-Igf2bp2-F                | ACCAAACGCCAGACGAGAAT                                                         |
| m-Igf2bp2-R                | CCTGATCTTGCGTTGTGCAG                                                         |
| m-Igf2bp3-F                | CTACGCGTTCGTGGACTG                                                           |
| m-Igf2bp3-R                | AGTTTACGAATCCTCTGCCGTT                                                       |
| m-Mettl3-F                 | CTGGGCACTTGGATTAAAGGAA                                                       |
| m-Mettl3-R                 | TGAGAGGTGGTGTAGCAACTT                                                        |
| Luciferase-F               | CTAAGGAAGTCGGGGAAGCG                                                         |
| Luciferase-R               | ATCCCCCTCGGGTGTAAATCA                                                        |
| 18S rRNA-F                 | GTAACCCGTTGAACCCCAT                                                          |
| 18S rRNA-R                 | CCATCCAATCGGTAGTAGCG                                                         |
| m-Mettl16-F                | TTGACATAGGTACTGGGGCATC                                                       |
| m-Mettl16-R                | CGGGAATTTACACCCTTGGC                                                         |
| pCDH-hMettl3-F             | ACCTCCATAGAAGATTCTAGAGCCACCATGTCGGACACGTG                                    |
| pCDH-hMettl3-R             | TTCGAATTCGCTAGCTCTAGActaCTTATCGTCATCGTCCTTGTAATCTAAATTCTTAGGTTTAGA<br>GATGAT |
| pCDH-hMettl16-F            | ACCTCCATAGAAGATTCTAGAGCCACCATGGCTCTGAGTAAATCAATG                             |
| pCDH-hMettl16-R            | TTCGAATTCGCTAGCTCTAGActaCTTATCGTCATCGTCCTTGTAATCGTTAACTGCAACAAGCCT           |
| pAAV-MCS-mKlf9-CDS-F       | ATTTCGAACATCGATTGAATTCATGTCCGCGGCCG                                          |
| pAAV-MCS-mKlf9-CDS-R       | CAGGTCGACTCTAGAGGATCCTCACAAAGGGGCTGGCA                                       |
| pGL3-control-mKlf9-CDS-F   | AGATCGCCGTGTAATTCTAGAGTGTGAGAAGAGATTTCATGAGGA                                |
| pGL3-control-mKlf9-CDS-R   | GCCGGCCGCCCCGACTCTAGAAAGTCAGAGACGGTTCAGAGT                                   |
| pGL3-control-mKlf9-3'UTR-F | AGATCGCCGTGTAATTCTAGAAAAAACCACCCCTCCATAGC                                    |
| pGL3-control-mKlf9-3'UTR-R | GCCGGCCGCCCCGACTCTAGACCCATCTTTGCCATAGGTTCTC                                  |
| shMettl3-F                 | CCGGCCTCAGTGGATCTGTTGTGATCTCGAGATCACAACAGATCCACTGAGGTTTTTG                   |
| shMettl3-R                 | AATTCAAAAACCTCAGTGGATCTGTTGTGATCTCGAGATCACAACAGATCCACTGAGG                   |
| shIgf2bp1-F                | CCGGGAAACACCTGACTCCAAAGTTCTCGAGAACTTTGGAGTCAGGTGTTCTTTTG                     |
| shIgf2bp1-R                | AATTCAAAAAGAAACACCTGACTCCAAAGTTCTCGAGAACTTTGGAGTCAGGTGTTTC                   |
| shIgf2bp2-F                | CCGGCCGTTGTCAACGTCACCTATACTCGAGTATAGGTGACGTTGACAACGGTTTTTG                   |
| shIgf2bp2-R                | AATTCAAAAACCGTTGTCAACGTCACCTATACTCGAGTATAGGTGACGTTGACAACGG                   |
| shIgf2bp3-F                | CCGGCGGCAGAGGATTTCGTAACCTTCTCGAGAAGTTTACGAATCCTCTGCCGTTTTTG                  |
| shIgf2bp3-R                | AATTCAAAAACGGCAGAGGATTCGTAACTTCTCGAGAAGTTTACGAATCCTCTGCCG                    |

**Supplementary Table 2 Information of antibodies used in this study**

| Antibody                | Source           | Catalog Number |
|-------------------------|------------------|----------------|
| anti-METTL3             | Abcam            | ab195352       |
| anti-UCP1               | Proteintech      | 23673-1-AP     |
| anti-m6A                | Synaptic Systems | 202 003        |
| anti-KLF9               | ABclonal         | A7196          |
| anti- $\alpha$ -Tubulin | Abclonal         | AC012          |
| anti-ACTB               | Proteintech      | 66009-1-Ig     |
